# Supplementary material
Source: PubMed Central journal article supplement (PMC2915690)

***SUPPLEMENTAL MATERIAL***

*for the manuscript by*

Takashi Daiho, Stefania Danko, Kazuo Yamasaki, and Hiroshi Suzuki

**Stable Structural Analog of Ca<sup>2+</sup>-ATPase ADP-insensitive Phosphoenzyme with  
Occluded Ca<sup>2+</sup> Formed by Elongation of A-domain/M1'-linker  
and Beryllium Fluoride Binding**

Supplemental Figure S1.

**Mn<sup>2+</sup> dependence of the rate of EP inhibition by BeF<sub>x</sub> in 0.01 mM Ca<sup>2+</sup>.**

In *A*, microsomes expressing the mutant 4Gi-46/47 were incubated for various periods with BeF<sub>x</sub> (1 mM KF plus 10 μM BeSO<sub>4</sub>) in 0.01 mM CaCl<sub>2</sub> and various concentrations of MnCl<sub>2</sub> in the absence of MgCl<sub>2</sub> otherwise as in Fig. 6. The samples were then diluted and phosphorylated with 10 μM [γ-<sup>32</sup>P]ATP and the amount of EP formed was determined as in Fig. 6. *Solid lines* show the least squares fit to a single exponential. In *B*, the rate constants obtained in *A* were plotted versus the concentration of Mn<sup>2+</sup> added. *K*<sub>0.5</sub> for the Mn<sup>2+</sup> activation and Hill coefficient obtained by fitting to the Hill equation (*solid line*) were 1.4 mM and 2.1, respectively.

Fig. S1

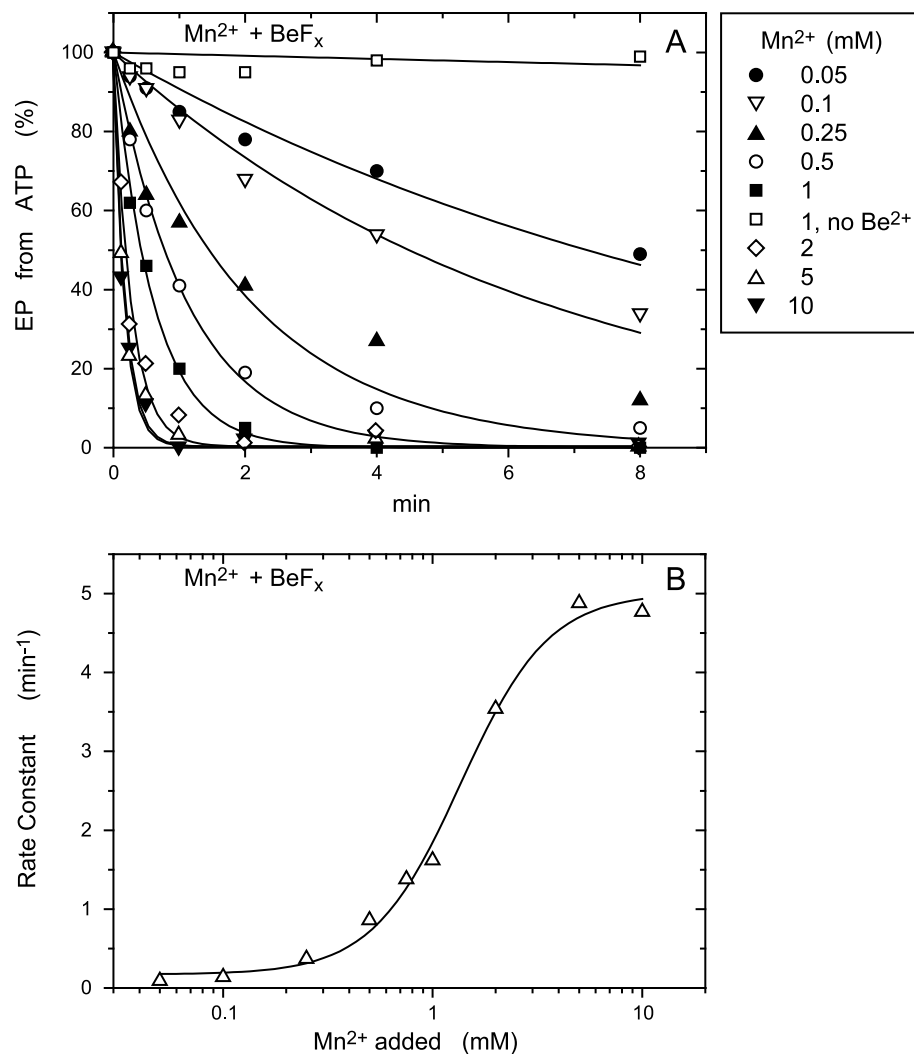

Supplemental Figure S2.

**Ca<sup>2+</sup> dependence of the rate of EP inhibition by BeF<sub>x</sub> in the absence of Mg<sup>2+</sup> and Mn<sup>2+</sup>.**

In *A*, microsomes expressing the mutant 4Gi-46/47 were incubated for various periods with BeF<sub>x</sub> (1 mM KF plus 10 μM BeSO<sub>4</sub>) and various concentrations of CaCl<sub>2</sub> in the absence of MgCl<sub>2</sub> otherwise as in Fig. 7. The samples were then diluted 10-fold and phosphorylated with 10 μM [ $\gamma$ -<sup>32</sup>P]ATP and the amount of EP formed was determined as in Fig. 7. *Solid lines* show the least squares fit to a single exponential. In *B*, the rate constants obtained in *A* were plotted versus the concentration of Ca<sup>2+</sup> added.  $K_{0.5}$  for the Ca<sup>2+</sup> activation and Hill coefficient obtained by fitting to the Hill equation (*solid line*) were 0.76 mM and 1.7, respectively.

Fig. S2

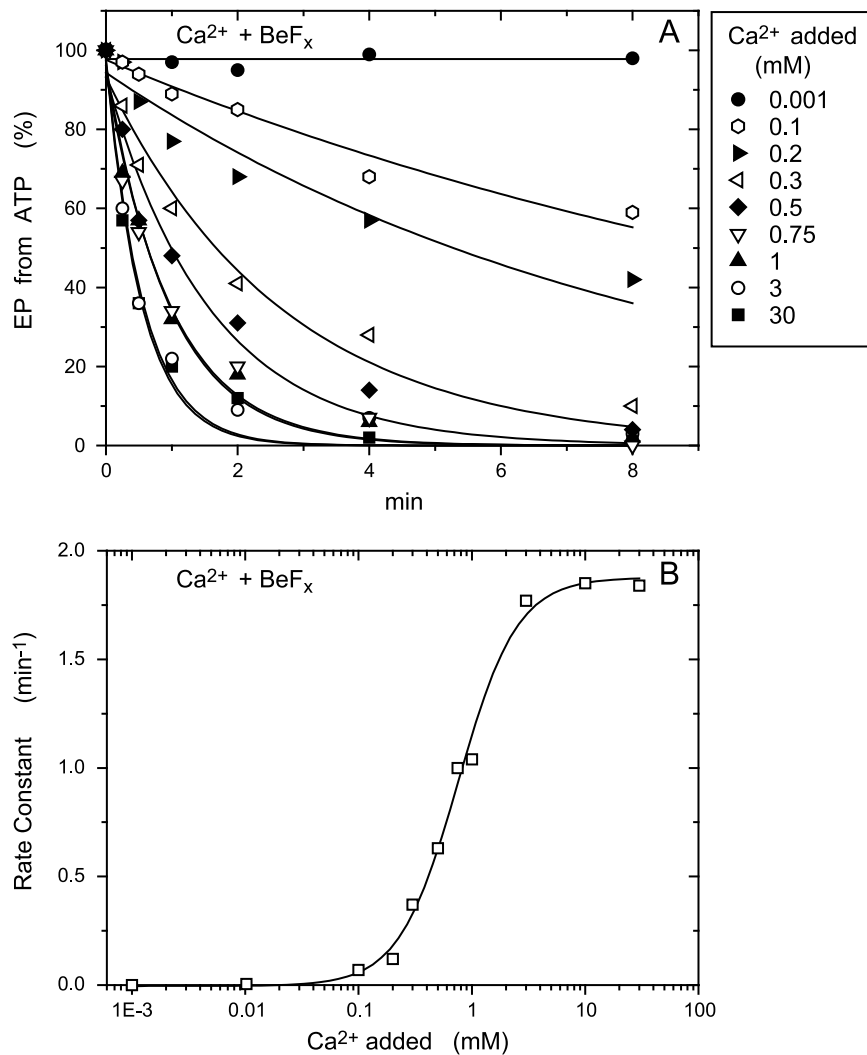

Supplemental Figure S3.

**Proteolysis of the major intermediates and  $\text{Ca}^{2+}$ -ATPase complexes with metal fluoride in  $\text{Ca}^{2+}$ .**

The major intermediates and their structural analogs were produced with the wild type and mutant 4Gi-46/47 in the microsomes (0.15 mg/ml) under the following conditions, and subjected to the limited proteolysis with 0.5 mg/ml trypsin (*A, B*) or prtK (*C, D*) at 25 °C and then to SDS-PAGE with the immunodetection as described in “EXPERIMENTAL PROCEDURES”.

The  $E2$  and  $E1\text{Ca}_2$  states were formed in 1 mM EGTA and in 0.01 mM  $\text{CaCl}_2$ , respectively, in 15 mM  $\text{MgCl}_2$ , 1  $\mu\text{M}$  A23187, 0.1 M KCl, and 50 mM MOPS/Tris (pH 7).

To produce  $EP$  from ATP, the microsomes were incubated at 25 °C for 10 s in 0.5 mM ATP, 10 mM  $\text{CaCl}_2$ , 15 mM  $\text{MgCl}_2$ , 1  $\mu\text{M}$  A23187, 0.1 M KCl, and 50 mM MOPS/Tris (pH 7.0). In the wild type,  $EP$  accumulated was exclusively  $E1\text{PCa}_2\text{-Ca}$  (ADP-sensitive  $EP$  with the occluded two  $\text{Ca}^{2+}$  and with bound  $\text{Ca}^{2+}$  at the catalytic  $\text{Mg}^{2+}$  site), and its isomerization (therefore decay) was extremely slowed due to the  $\text{Ca}^{2+}$  ligation at the catalytic  $\text{Mg}^{2+}$  site and the feedback inhibition by the high concentration of luminal  $\text{Ca}^{2+}$ . In the mutant,  $EP$  accumulated was exclusively  $E2\text{PCa}_2\text{-Ca}$  (ADP-insensitive  $EP$  with the occluded two  $\text{Ca}^{2+}$  and with bound  $\text{Ca}^{2+}$  at the catalytic  $\text{Mg}^{2+}$  site), and its decay was almost completely blocked due to the elongation of the A/M1'-linker (14).

To produce  $E1\text{Ca}_2\text{-AlF}_x$ , the microsomes were incubated at 25 °C for 30 min in 0.01 mM  $\text{CaCl}_2$ , 1 mM KF, 50  $\mu\text{M}$   $\text{AlCl}_3$ , 15 mM  $\text{MgCl}_2$ , 0.1 M KCl, and 50 mM MOPS/Tris (pH 7.0). For the  $E1\text{Ca}_2\text{-AlF}_4\text{-ADP}$  formation, the microsomes were further incubated for 10 min with 0.5 mM ADP.

The  $\text{BeF}_x$  treatment of the microsomes was performed in 0.01 mM  $\text{CaCl}_2$ , 1 mM KF, 50  $\mu\text{M}$   $\text{BeSO}_4$ , 0.1 M KCl, and 50 mM MOPS/Tris (pH 7) in the presence of 15 mM  $\text{MgCl}_2$ , or in place of  $\text{MgCl}_2$ , 10 mM  $\text{CaCl}_2$  or 1 mM  $\text{MnCl}_2$  as indicated in the figure. The wild type produced the  $E1\text{PCa}_2$  analog  $E1\text{Ca}_2\text{-BeF}_3^-$  with  $\text{Mg}^{2+}$  and  $\text{Mn}^{2+}$  but not with  $\text{Ca}^{2+}$  (27), and the mutant produced the  $E2\text{PCa}_2$  analog  $E2\text{Ca}_2\text{-BeF}_3^-$  with  $\text{Mg}^{2+}$ ,  $\text{Mn}^{2+}$ , and  $\text{Ca}^{2+}$ .

The tryptic T1 site is very rapidly cleaved producing the fragments “A” (Met<sup>1</sup>-Arg<sup>505</sup>, immunodetected) and “B” (Ala<sup>506</sup> to the C-terminus Gly<sup>994</sup>, not immunodetected). Further cleavage at T2 site (Arg<sup>198</sup>) produces the fragments “A1” (Ala<sup>199</sup> to Arg<sup>505</sup>, immunodetected) and “A2” (Met<sup>1</sup> to Arg<sup>198</sup>, not immunodetected). The fragments formed by prtK are “p95” (Lys<sup>120</sup>-Gly<sup>994</sup>), “p81” (Met<sup>1</sup>-Met<sup>733</sup>), and “p83” (Glu<sup>243</sup>-Gly<sup>994</sup>) (all immunodetected) (54, 55). The digestion periods and the positions of the  $\text{Ca}^{2+}$ -ATPase, its fragments, and the molecular mass markers (kDa) are indicated. Note that the antibody unexpectedly immunodecorated trypsin (*A, B*) as previously observed (14). PrtK was also immunodecorated by the antibody against the  $\text{Ca}^{2+}$ -ATPase (*C, D*) as noted previously (14), but this band at the bottom of gels seems to include small ATPase fragments in addition to prtK since the rapid ATPase digestion is apparently associated with the more intense immunodecoration. In *A* and *B*, a band was sometimes observed after 4 min digestion and whose mass is intermediate (roughly ~60 kDa) between those of native ATPase and the “A” fragment. In the literature, such a fragment has never been observed in the tryptic digestion of the SR  $\text{Ca}^{2+}$ -ATPase, *i.e.* the rapid cleavage at T1 site (Arg<sup>505</sup>) always occurs first producing the “A” and “B” fragments, whose migration rates are virtually the same in this SDS-PAGE system (*e.g.* see Refs. 23, 24). Therefore, the ~60-kDa band may possibly be due to non-specific immunodecoration of some fragment of contaminating protein (of which mass before cleavage is possibly similar to the 110 kDa-ATPase chain) in the microsome preparation.

Cleavage and resistance at the major sites Arg<sup>198</sup>, Leu<sup>119</sup>, and Thr<sup>242</sup> are summarized in supplemental Table S1, and the results are described below in “*Proteolytic Structural Analysis of  $E2\text{Ca}_2\text{-BeF}_3^-$  ( $E2\text{PCa}_2$ ) and Other Intermediates Formed from  $E1\text{Ca}_2$* ”.

Supplemental Figure S4.

**Proteolysis of the  $\text{Ca}^{2+}$ -ATPase complexes with metal fluoride formed without  $\text{Ca}^{2+}$  and treated with subsequently added  $\text{Ca}^{2+}$ .**

$\text{Ca}^{2+}$ -free  $E2\text{-BeF}_3^-$ ,  $E2\text{-AlF}_4^-$ , and  $E2\text{-MgF}_4^{2-}$  were produced with the microsomes (0.15 mg/ml) in 1 mM EGTA, 1 mM KF, 1  $\mu\text{M}$  A23187, and 50 mM MOPS/Tris (pH 7) by the incubation at 25 °C for 30 min in 50  $\mu\text{M}$   $\text{BeSO}_4$ , 7 mM  $\text{MgCl}_2$ , and 50 mM LiCl ( $E2\text{-BeF}_3^-$ ); 50  $\mu\text{M}$   $\text{AlCl}_3$ , 1 mM  $\text{MgCl}_2$ , and 0.1 M KCl ( $E2\text{-AlF}_4^-$ ); and 5 mM  $\text{MgCl}_2$  and 0.1 M KCl ( $E2\text{-MgF}_4^{2-}$ ). These complexes were further incubated with and without the addition of 10 mM  $\text{Ca}^{2+}$  at 25 °C for 30 min, and subjected to proteolysis with trypsin (*A, B*) or prtK (*C, D*), SDS-PAGE, and immunodetection as in Supplemental Fig. S3. Cleavage and resistance at Arg<sup>198</sup>, Leu<sup>119</sup>, and Thr<sup>242</sup> are summarized in supplemental Table S2, and the results are described below in “*Proteolytic Structural Analysis of  $E2\text{Ca}_2\text{-BeF}_3^-$  Formed from  $E2\text{-BeF}_3^-$  and  $\text{Ca}^{2+}$* ”.

Fig. S3A,B

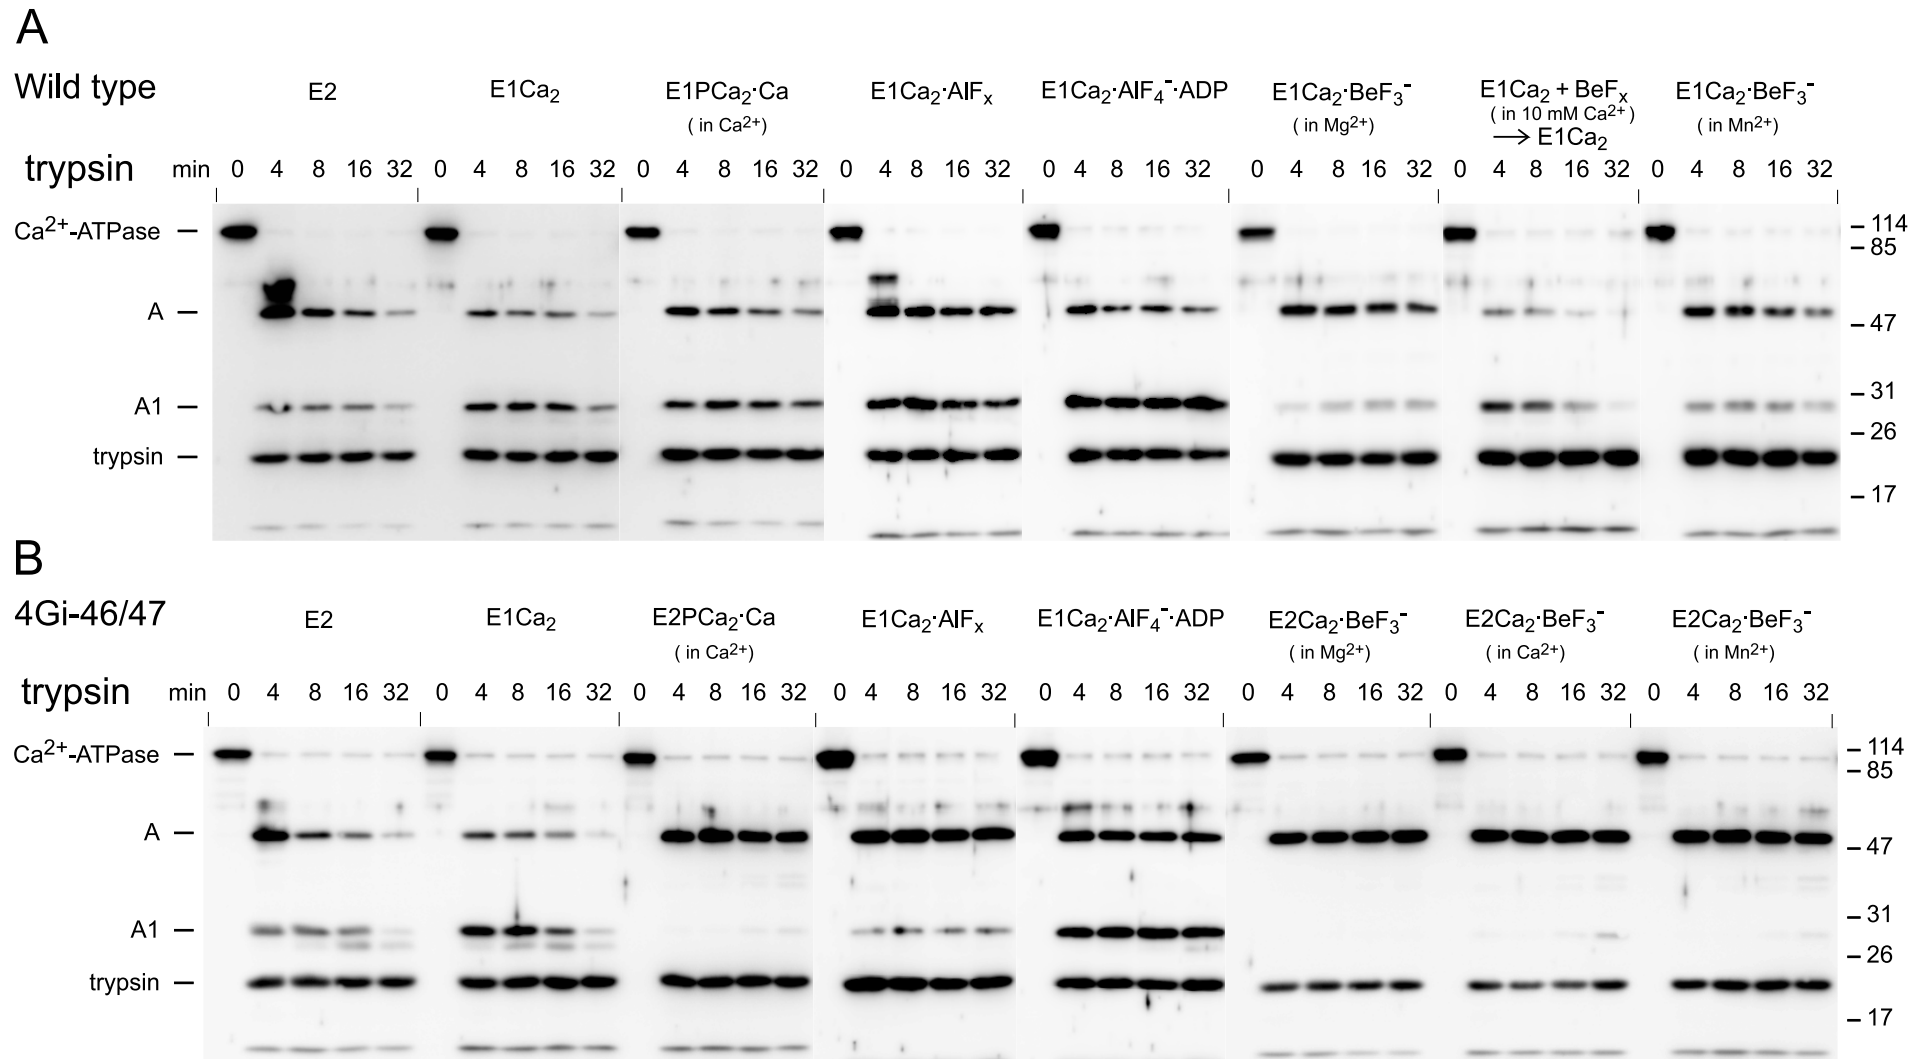

Fig. S3C,D

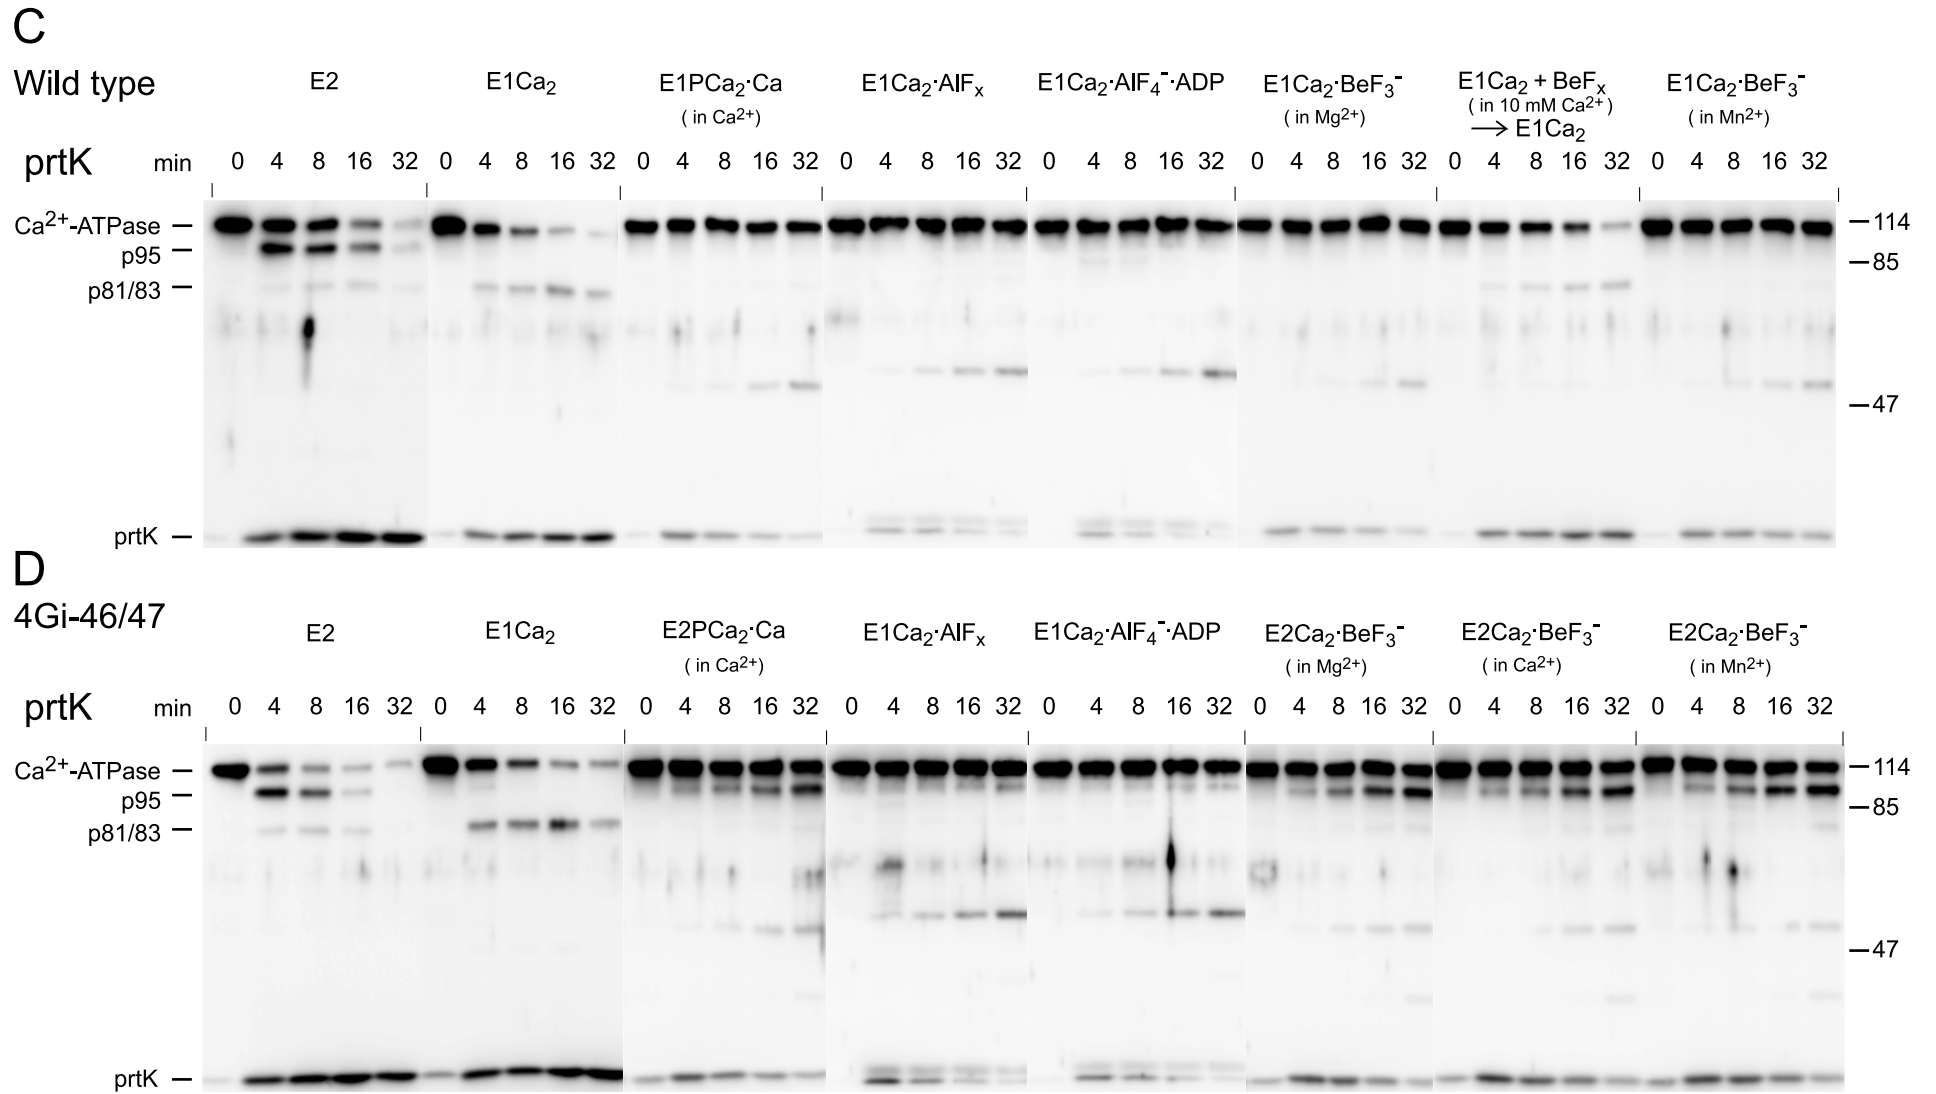

Fig. S4A,B

A

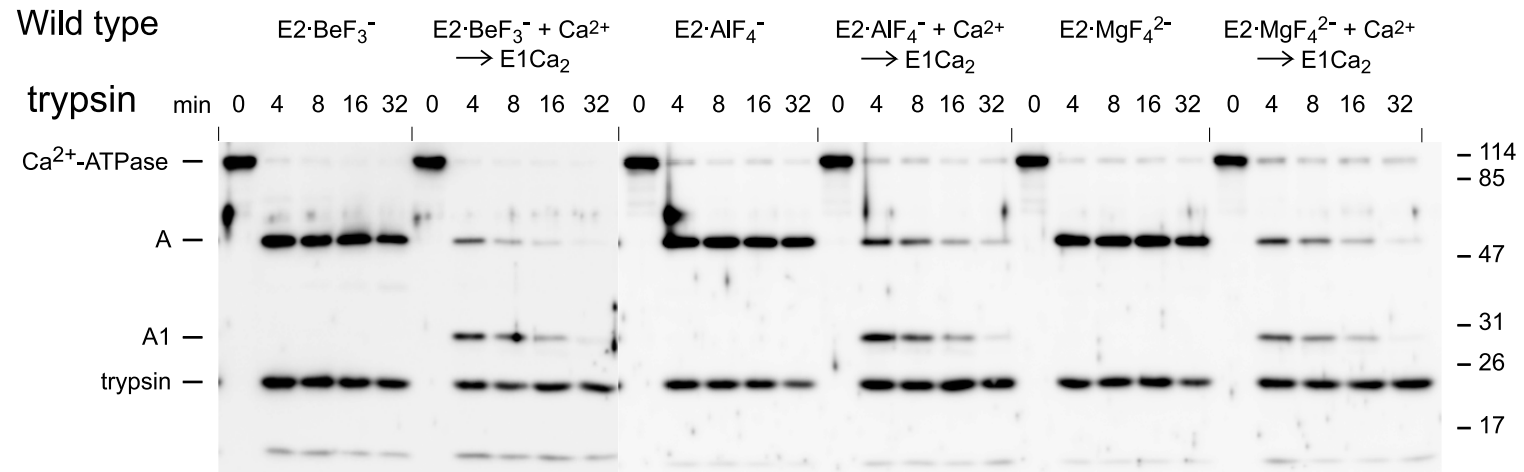

B

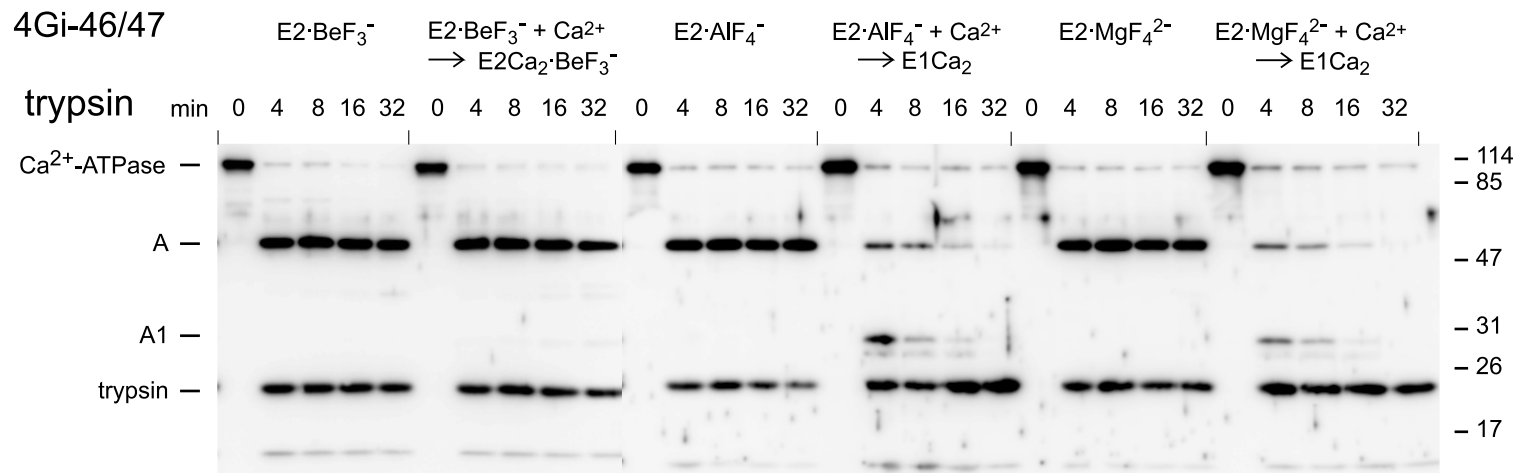

Fig. S4C,D

C

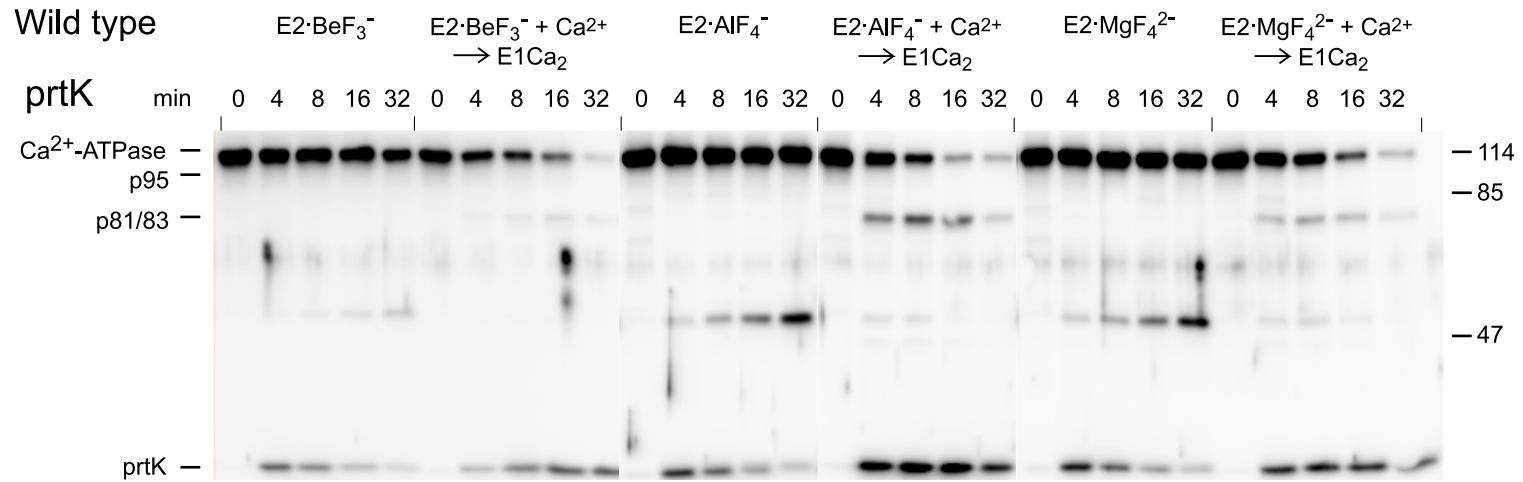

D

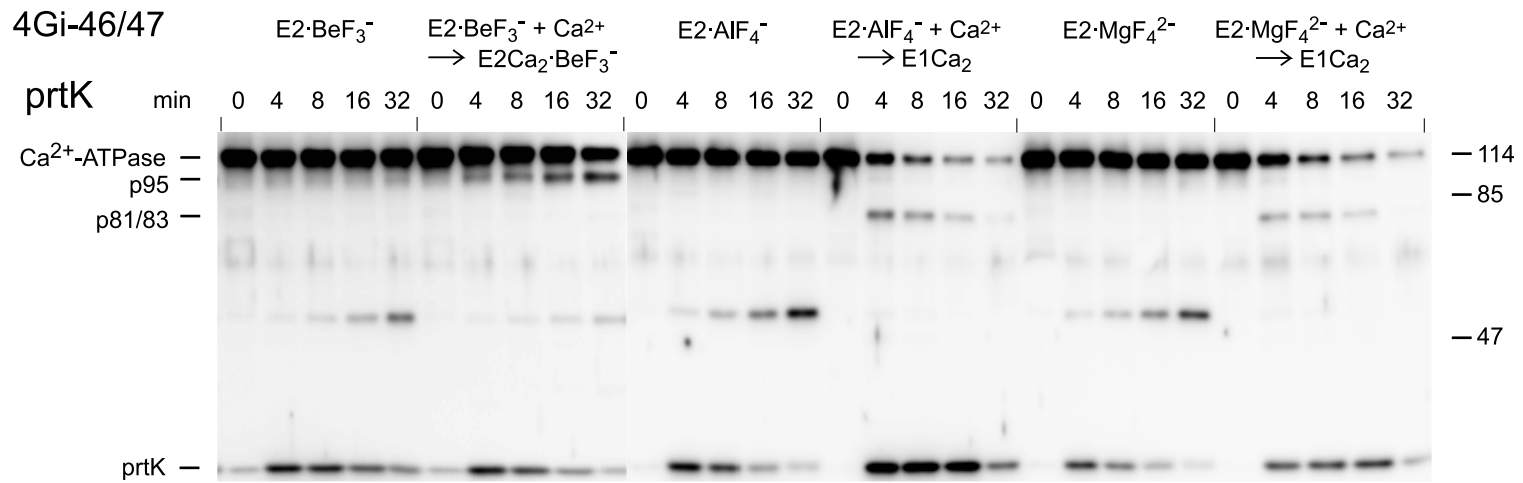



## Supplemental Table S1

**Summary of proteolysis of the major intermediates and their analogs in supplemental Fig. S3.**

Relative cleavage rates of the tryptic T2 site (Arg<sup>198</sup>) and prtK sites (Leu<sup>119</sup> and Thr<sup>242</sup>), and the complete resistance against the proteases were classified as follows by the visual inspection of the band intensities (A1, p95, and p81/83, respectively) in supplemental Fig. S3. The result for *E2*·BeF<sub>3</sub><sup>-</sup> (in Mg<sup>2+</sup>) in supplemental Fig. S4 was also included.

(+++ ) cleaved rapidly

(++ ) cleaved at moderate rate

(+ ) cleaved slowly

(- ) completely resistant

| Cleavage site                                          |           | <i>E2</i> | → <i>E1Ca</i> <sub>2</sub> | → <i>E1Ca</i> <sub>2</sub> ·AlF <sub>4</sub> <sup>-</sup> ·ADP | ~ <i>E1Ca</i> <sub>2</sub> ·AlF <sub>x</sub> | → <i>E1PCa</i> <sub>2</sub><br><i>E1Ca</i> <sub>2</sub> ·BeF <sub>3</sub> <sup>-</sup><br>(in Mg <sup>2+</sup> or Mn <sup>2+</sup> ) | → <i>E2PCa</i> <sub>2</sub><br><i>E2Ca</i> <sub>2</sub> ·BeF <sub>3</sub> <sup>-</sup><br>(in Mg <sup>2+</sup> , Mn <sup>2+</sup> , or Ca <sup>2+</sup> ) | → <i>E2P</i><br><i>E2</i> ·BeF <sub>3</sub> <sup>-</sup><br>(in Mg <sup>2+</sup> ) |
|--------------------------------------------------------|-----------|-----------|----------------------------|----------------------------------------------------------------|----------------------------------------------|--------------------------------------------------------------------------------------------------------------------------------------|-----------------------------------------------------------------------------------------------------------------------------------------------------------|------------------------------------------------------------------------------------|
| Arg <sup>198</sup><br>( tryptic T2 )<br>producing “A1” | Wild type | +++       | +++                        | +++                                                            | +++                                          | +                                                                                                                                    | No accumulation                                                                                                                                           | -                                                                                  |
|                                                        | 4Gi-46/47 | +++       | +++                        | +++                                                            | ++                                           | No accumulation                                                                                                                      | -                                                                                                                                                         | -                                                                                  |
| -----                                                  |           |           |                            |                                                                |                                              |                                                                                                                                      |                                                                                                                                                           |                                                                                    |
| Leu <sup>119</sup> ( prtK )<br>producing “p95”         | Wild type | +++       | -                          | -                                                              | -                                            | -                                                                                                                                    | No accumulation                                                                                                                                           | -                                                                                  |
|                                                        | 4Gi-46/47 | +++       | -                          | -                                                              | -                                            | No accumulation                                                                                                                      | ++                                                                                                                                                        | -                                                                                  |
| -----                                                  |           |           |                            |                                                                |                                              |                                                                                                                                      |                                                                                                                                                           |                                                                                    |
| Thr <sup>242</sup> ( prtK )<br>producing<br>“p81/83”   | Wild type | ++        | ++                         | -                                                              | -                                            | -                                                                                                                                    | No accumulation                                                                                                                                           | -                                                                                  |
|                                                        | 4Gi-46/47 | ++        | +++                        | -                                                              | -                                            | No accumulation                                                                                                                      | -                                                                                                                                                         | -                                                                                  |

## Supplemental Table S2

**Summary of proteolysis of  $E2\cdot\text{BeF}_3^-$ ,  $E2\cdot\text{AlF}_4^-$ , and  $E2\cdot\text{MgF}_4^{2-}$  with and without treatment by 10 mM  $\text{Ca}^{2+}$  in A23187 in supplemental Fig. S4.**

Relative cleavage rates and the complete resistance were classified with the band intensities in supplemental Fig. S4 as described in supplemental Table S1.

( +++ ) cleaved rapidly

( ++ ) cleaved at moderate rate

( + ) cleaved slowly

( - ) completely resistant

| Cleavage site                                          | <i>E2P</i> | +10 mM $\text{Ca}^{2+}$ |               |                    |               | +10 mM $\text{Ca}^{2+}$            |               |                    | +10 mM $\text{Ca}^{2+}$ |               |                 |                            |               |                 |
|--------------------------------------------------------|------------|-------------------------|---------------|--------------------|---------------|------------------------------------|---------------|--------------------|-------------------------|---------------|-----------------|----------------------------|---------------|-----------------|
|                                                        |            | $E2\cdot\text{BeF}_3^-$ | $\rightarrow$ | $E2\text{PCa}_2$   | $\rightarrow$ | $E1\text{Ca}_2\cdot\text{BeF}_3^-$ | $\rightarrow$ | $E1\text{Ca}_2$    | $E2\cdot\text{AlF}_4^-$ | $\rightarrow$ | $E1\text{Ca}_2$ | $E2\cdot\text{MgF}_4^{2-}$ | $\rightarrow$ | $E1\text{Ca}_2$ |
| Arg <sup>198</sup><br>( tryptic T2 )<br>producing "A1" | Wild type  | —                       |               | No<br>accumulation |               | No<br>accumulation                 |               | +++                | —                       |               | +++             | —                          |               | +++             |
|                                                        | 4Gi-46/47  | —                       |               | —                  |               | No<br>accumulation                 |               | No<br>accumulation | —                       |               | +++             | —                          |               | +++             |
| Leu <sup>119</sup> ( prtK )<br>producing "p95"         | Wild type  | —                       |               | No<br>accumulation |               | No<br>accumulation                 |               | —                  | —                       |               | —               | —                          |               | —               |
|                                                        | 4Gi-46/47  | —                       |               | +++                |               | No<br>accumulation                 |               | No<br>accumulation | —                       |               | —               | —                          |               | —               |
| Thr <sup>242</sup> ( prtK )<br>producing<br>"p81/83"   | Wild type  | —                       |               | No<br>accumulation |               | No<br>accumulation                 |               | ++                 | —                       |               | +++             | —                          |               | ++              |
|                                                        | 4Gi-46/47  | —                       |               | —                  |               | No<br>accumulation                 |               | No<br>accumulation | —                       |               | +++             | —                          |               | ++              |

***Proteolytic Structural Analysis of  $E2Ca_2 \cdot BeF_3^-$  ( $E2PCa_2$ ) and Other Intermediates Formed from  $E1Ca_2$  — for supplemental Fig. S3 and Table S1 —***

**Strategy :**

In *EP* isomerization and  $Ca^{2+}$  release ( $E1PCa_2 \rightarrow E2P + 2Ca^{2+}$ ), the A domain substantially rotates and comes above one half of the P domain, and these domains incline significantly towards M2, which also inclines (see Fig. 2). In the resulting *E2P*, the A domain is associated with the P domain through interaction networks at the TGES<sup>184</sup> loop with the Asp<sup>351</sup> region and at the Val<sup>200</sup> loop with the polar residues of the P domain. In *E2P*, the A and P domains also associate through a hydrophobic interaction network with the top part of M2 at Tyr<sup>122</sup> and Leu<sup>119</sup>, the compact Tyr<sup>122</sup>-hydrophobic cluster (or the loose cluster, see more in supplemental Fig. S5 and the following section). These motions and changes in domain organization are definitively monitored by the changes in the resistance against trypsin at the tryptic T2 site Arg<sup>198</sup> on the Val<sup>200</sup> loop and against proteinase K (prtK) at the major cleavage sites Leu<sup>119</sup> on the top part of M2 and at Thr<sup>242</sup> on the A/M3-linker as demonstrated previously (23, 24) and as noted below.

**Arg<sup>198</sup>:** the association of the largely rotated A domain with the P domain at the Val<sup>200</sup> loop by ionic and hydrogen bonding interactions involving Arg<sup>198</sup> is explicitly monitored by the complete resistance of Arg<sup>198</sup> against the tryptic attack.

**Leu<sup>119</sup>:** formation of the interactions involving Leu<sup>119</sup> and Tyr<sup>122</sup> on the top part of M2 are clearly monitored by the complete resistance at Leu<sup>119</sup> against prtK attack. In *E1PCa<sub>2</sub>*, Tyr<sup>122</sup>-Leu<sup>119</sup> on the top part of M2 is in van der Waals contact with the top of M4. In *E2P*, Tyr<sup>122</sup>/Leu<sup>119</sup> on M2 engages in the hydrophobic interaction network with the A and P domains. Thus both in the *E1PCa<sub>2</sub>* and *E2P* states, Leu<sup>119</sup> is completely resistant against prtK attack. Then note that in order to realize the *E2P* structure from *E1PCa<sub>2</sub>*, M2 (Tyr<sup>122</sup>/Leu<sup>119</sup>) should move away from its contact with M4, and largely incline to the A and P domains to produce the interaction at Tyr<sup>122</sup>/Leu<sup>119</sup>. Therefore in the intermediate transient state during  $E1PCa_2 \rightarrow E2P + 2Ca^{2+}$ , Leu<sup>119</sup> becomes sterically available to prtK attack (as actually found in the transient state *E2PCa<sub>2</sub>* and  $E2Ca_2 \cdot BeF_3^-$  stabilized by the elongation of the A/M1'-linker).

**Thr<sup>242</sup>:** Upon ATP binding and *E1PCa<sub>2</sub>* formation (as seen in the change  $E1Ca_2 \rightarrow E1Ca_2 \cdot CaAMPPCP/E1Ca_2 \cdot AlF_4^- \cdot ADP$ ), the A domain rotates perpendicularly to the membrane plane thereby raising its junction with the A/M3-linker (as well as with the A/M1'-linker) and imposing a strain on this A/M3-linker (18). This change apparently causes complete resistance of Thr<sup>242</sup> on the A/M3-linker against the prtK attack (18, 19, 24, 27). The strain of the A/M3-linker has been predicted to function as a motive force of the large A-domain's rotation parallel to membrane for the *E1P* to *E2P* isomerization (18, 19, 50, 51).

**Results and Conclusion :**

Shown in supplemental Fig. S3 and Table S1 are the proteolytic patterns and the approximate cleavage rates and resistance at Arg<sup>198</sup> (producing A1 fragment) and at Leu<sup>119</sup> and Thr<sup>242</sup> (producing p95 and p81/83 fragments, respectively). In  $E2Ca_2 \cdot BeF_3^-$  and *E2PCa<sub>2</sub>*, the tryptic T2 site Arg<sup>198</sup> is completely resistant as in  $E2 \cdot BeF_3^-$  and *E2P*. On the other hand, the prtK site Leu<sup>119</sup> in  $E2Ca_2 \cdot BeF_3^-$  and *E2PCa<sub>2</sub>* is rapidly cleaved, in sharp contrast to its complete resistance in  $E1Ca_2 \cdot BeF_3^-/E1PCa_2$  and  $E2 \cdot BeF_3^-/E2P$ . The results reveal that in  $E2Ca_2 \cdot BeF_3^-$  and *E2PCa<sub>2</sub>*, the A domain has already largely rotated from the position in  $E1Ca_2 \cdot BeF_3^-/E1PCa_2$  and docked onto the P domain at the Val<sup>200</sup> loop (and at TGES<sup>184</sup>) as in  $E2 \cdot BeF_3^-/E2P$ , and that Leu<sup>119</sup>/Tyr<sup>122</sup> on the top part of M2 has been released from its contact with M4 in  $E1Ca_2 \cdot BeF_3^-/E1PCa_2$  but not yet reached a position to produce the interaction network at Leu<sup>119</sup>/Tyr<sup>122</sup> with the A and P domains (Tyr<sup>122</sup>-hydrophobic cluster) in the  $E2 \cdot BeF_3^-/E2P$ . Thus the structure of  $E2Ca_2 \cdot BeF_3^-$  and *E2PCa<sub>2</sub>* is intermediate between those of  $E1Ca_2 \cdot BeF_3^-/E1PCa_2$  and  $E2 \cdot BeF_3^-/E2P$ .

It is concluded that in the transient *E2PCa<sub>2</sub>* state and its analog  $E2Ca_2 \cdot BeF_3^-$  stabilized by elongation of the A/M1'-linker, the inclining motions of M2 and the A and P domains have not yet advanced enough to gather and form the interaction network around Leu<sup>119</sup>/Tyr<sup>122</sup>. Actually, formation of this interaction network has been shown to be critical for  $Ca^{2+}$  release and formation of the  $Ca^{2+}$ -released *E2P* ground state by mutations of each of the seven residues involved in the network, Tyr<sup>122</sup>-hydrophobic cluster (11-13). The results also reveal the critical role of the native length of A/M1'-linker for inducing the inclining motions of the A and P domains and M2 to deocclude and release  $Ca^{2+}$  from *E2PCa<sub>2</sub>* and to produce the *E2P* ground state structure.

Regarding  $E1Ca_2 \cdot BeF_3^-$  of wild type (*E1PCa<sub>2</sub>*·Mg analog), it should be mentioned that the T2 site Arg<sup>198</sup> is cleaved more slowly than in  $E1Ca_2 \cdot AlF_4^- \cdot ADP$  and  $E1Ca_2 \cdot AlF_x$  (the transition state analogs of

phosphorylation) as demonstrated previously (27). This indicates that during  $E1PCa_2 \cdot Mg$  formation from the transition state, the A domain likely rotates to some extent parallel to the membrane plane and brings Arg<sup>198</sup> close to the P domain (although this change is obviously not enough to reach the  $E2PCa_2$  and  $E2P$  states, *i.e.* for the change  $E1PCa_2 \rightarrow E2PCa_2 \rightarrow E2P + 2Ca^{2+}$ , the A domain should further rotate to produce its association with the P domain at Arg<sup>198</sup>) (27). Interestingly, the T2 site cleavage rate in  $E1Ca_2 \cdot AlF_x$  of the elongated A/M1'-linker mutant is between those of the wild-type  $E1Ca_2 \cdot AlF_4^- \cdot ADP / E1Ca_2 \cdot AlF_x$  and  $E1Ca_2 \cdot BeF_3^-$ . The result indicates that elongation of the A/M1'-linker allows some rotation of the A domain, thereby bringing the structure of mutant  $E1Ca_2 \cdot AlF_x$  close (but not completely) to that of the wild-type  $E1Ca_2 \cdot BeF_3^-$  (see more in "DISCUSSION").

### ***Proteolytic Structural Analysis of $E2Ca_2 \cdot BeF_3^-$ Formed from $E2 \cdot BeF_3^-$ and $Ca^{2+}$***

— for supplemental Fig. S4 and Table S2 —

The effect of high concentration 10 mM of  $Ca^{2+}$  in the presence of A23187 on the structure of  $E2 \cdot BeF_3^-$ ,  $E2 \cdot AlF_4^-$ , and  $E2 \cdot MgF_4^{2-}$  were examined by proteolysis. In the A/M1'-linker elongated mutant,  $Ca^{2+}$ -treatment of  $E2 \cdot BeF_3^-$  results in exactly the same proteolytic pattern as for  $E2Ca_2 \cdot BeF_3^-$  formed from  $E1Ca_2$  and  $BeF_x$ . The results show that the stable  $E2Ca_2 \cdot BeF_3^-$  is produced from  $E2 \cdot BeF_3^-$  most probably by luminal  $Ca^{2+}$  binding to the transport sites (mimicking  $E2P + 2Ca^{2+} \rightarrow E2PCa_2$ ).

In wild type, the  $E2 \cdot BeF_3^-$  complex is destroyed by 10 mM  $Ca^{2+}$  and converted to  $E1Ca_2$ . This is probably by the conversion  $E2 \cdot BeF_3^- + 2Ca^{2+} \rightarrow E1Ca_2 \cdot BeF_3^-$  (mimicking luminal  $Ca^{2+}$ -induced reverse conversion  $E2P + 2Ca^{2+} \rightarrow E1PCa_2$ ) and by the subsequent  $Ca^{2+}$  substitution of  $Mg^{2+}$  at the catalytic site in  $E1Ca_2 \cdot BeF_3^-$  as shown previously (27).

$E2 \cdot AlF_4^-$  and  $E2 \cdot MgF_4^{2-}$  complexes of the mutant and wild type are also destroyed by 10 mM  $Ca^{2+}$  resulting in  $E1Ca_2$ . This is probably because  $Ca^{2+}$  at such a high concentration disrupts the closed gate, *i.e.* the closed structure of the  $Ca^{2+}$ -releasing pathway in the transmembrane and luminal regions, and consequently disorganizes the  $AlF_4^-$ - and  $MgF_4^{2-}$ -ligations at the catalytic site as described previously (27).

Supplemental Figure S5.

**Interaction network around Leu<sup>119</sup>/Tyr<sup>122</sup> on M2 with the A, P, and N domains in E2P analogs.**

The crystal structures  $E1Ca_2 \cdot AlF_4^- \cdot ADP$ ,  $E2 \cdot BeF_3^-$ ,  $E2 \cdot BeF_3^-(TG)$  are depicted as in Fig. 2 (PDB accession code 1T5T (17), 2ZBE (21), and 2ZBF (21), respectively). *Upper panels*, whole molecules; *lower panels*, regions of the seven hydrophobic residues involved in the Tyr<sup>122</sup>-hydrophobic cluster in  $E2 \cdot BeF_3^-(TG)$  ( $Y^{122}$ -HC, *semitransparent green sphere*). These seven residues are Leu<sup>119</sup>/Tyr<sup>122</sup> on the top part of M2, Ile<sup>179</sup>/Leu<sup>180</sup>/Ile<sup>232</sup> of the A domain, and Val<sup>705</sup>/Val<sup>726</sup> of the P domain. In  $E2 \cdot BeF_3^-(TG)$ , the compact Tyr<sup>122</sup>-hydrophobic cluster is fully achieved. On the other hand,  $E2 \cdot BeF_3^-$  crystallized without TG possesses a rather loose cluster (Ile<sup>179</sup>/Leu<sup>180</sup>/Ile<sup>232</sup> and Val<sup>705</sup>/Val<sup>726</sup>, *semitransparent blue sphere*) and a more extended interaction network (*dashed green line circle*) involving Leu<sup>119</sup> and Lys<sup>120</sup> next to Leu<sup>119</sup>/Tyr<sup>122</sup> (*semitransparent pink sphere*). See more in the following analysis of the structure and role of the interaction network.

**Hydrophobic Interactions at Tyr<sup>122</sup> for E2P Ground State: Fully Realized Compact Tyr<sup>122</sup>-hydrophobic Cluster or Rather Loose Cluster?**

In the crystal structure  $E2 \cdot BeF_3^-(TG)$  as well as in  $E2 \cdot AlF_4^-(TG)$ ,  $E2 \cdot MgF_4^{2-}(TG)$ , and  $E2 \cdot AlF_4^- \cdot AMPPCP$  without TG, the Tyr<sup>122</sup>-hydrophobic cluster is fully formed by the seven residues on the top part of M2 and the A and P domains. In  $E2 \cdot BeF_3^-$  crystallized without TG (2ZBE (21) and 3B9B (22)), the side chains of Leu<sup>119</sup> and Tyr<sup>122</sup> are peripheral to and oriented outward from the other five clustered residues (Ile<sup>179</sup>/Leu<sup>180</sup>/Ile<sup>232</sup> and Val<sup>705</sup>/Val<sup>726</sup>), and Leu<sup>119</sup> is in close contact with Thr<sup>430</sup> on the N domain (2ZBE). Also in  $E2 \cdot BeF_3^-$  without TG, Lys<sup>120</sup> next to Leu<sup>119</sup>/Tyr<sup>122</sup> is now facing the P domain and in close contact with Gly<sup>723</sup>/Ser<sup>722</sup>/Lys<sup>728</sup> in the immediate vicinity of Val<sup>726</sup> of the hydrophobic cluster. Thus,  $E2 \cdot BeF_3^-$  crystallized without TG possesses a rather loose cluster but has a more extended interaction network around Leu<sup>119</sup>/Tyr<sup>122</sup>. The inaccessibility of the prtK-site Leu<sup>119</sup> (completely resistant) both in TG-free  $E2 \cdot BeF_3^-$  (the Ca<sup>2+</sup>-released E2P) and in  $E2 \cdot BeF_3^-$  with bound TG (Refs. 23-25, also supplemental Figs. S3 and S4) may be reasonably accounted for by its steric protection seen in the crystal structures.

Our biochemical studies in solution (25) demonstrated that TG binding to  $E2 \cdot BeF_3^-$  closes the luminal gate from an open state, as in fact seen in the crystal structural change accompanying  $E2 \cdot BeF_3^- \rightarrow E2 \cdot BeF_3^-(TG)$  (21).  $E2 \cdot AlF_4^-$ , the transition state analog of E2P hydrolysis, was also demonstrated in solution to have a closed luminal gate in contrast to the open one in  $E2 \cdot BeF_3^-$ , the E2P ground state analog (25). Therefore according to the crystals  $E2 \cdot BeF_3^-$  and  $E2 \cdot BeF_3^-(TG)$ , the compact Tyr<sup>122</sup>-hydrophobic cluster is expected to be fully formed together with luminal gate closure during the reaction from E2P ground state to the transition state of E2P hydrolysis.

On the other hand, we found by mutation and kinetic studies of each of the seven residues involved in the Tyr<sup>122</sup>-hydrophobic cluster (11-13) that all the seven residues are critical for Ca<sup>2+</sup> release from the transient E2PCa<sub>2</sub> state and for E2P hydrolysis, therefore probably for formation of the Ca<sup>2+</sup>-free E2P ground state structure. Actually, mutation of Tyr<sup>122</sup> and Leu<sup>119</sup> among the seven residues caused the most severe functional defect, indicating that they play central roles in the interaction network (13). Our preferred view from these findings is rather that, under physiological (not crystallizing) conditions, a full and compact Tyr<sup>122</sup>-hydrophobic cluster is required for (*i.e.* present in) the E2P ground state structure, which possesses the lumenally opened Ca<sup>2+</sup> release pathway and the catalytic site with hydrolytic function (11-13). This view seemingly conflicts with the atomic structure of  $E2 \cdot BeF_3^-$  (although this prediction was made before the  $E2 \cdot BeF_3^-$  crystal structure was solved).

An important question for us now is whether the Tyr<sup>122</sup>-hydrophobic cluster should be fully formed by all seven residues under physiological (not crystallizing) conditions to realize the E2P ground state, or is a loose cluster with an extended interaction network around Tyr<sup>122</sup> (seen in the  $E2 \cdot BeF_3^-$  crystal) sufficient to stabilize this state. A compromise would be that the gathering of all seven residues in the Tyr<sup>122</sup>-hydrophobic cluster occurs in some ordered sequence and not necessarily all at once. In fact, mutation of each of the seven residues exhibited different degrees of functional inhibition (see more detailed discussion in Ref. 13).

Nevertheless, we should take into account possible structural perturbations by agents used for stabilizing the transmembrane helices during crystallization of  $E2 \cdot BeF_3^-$  with the luminal Ca<sup>2+</sup>-release pathway open (gate). For example, in the structure of  $E2 \cdot BeF_3^-$  crystallized without TG, Mg<sup>2+</sup> is bound at or near Glu<sup>309</sup> (the Ca<sup>2+</sup> binding site II) because of the very high concentration of Mg<sup>2+</sup> used (50 mM, 3B9B (22)), or a low pH could protonate the Ca<sup>2+</sup> ligands (pH 5.7, 2ZBE (21)). The transmembrane structures stabilized in these ways might possibly differ from those in the absence of such agents.

To expand on these examples, let us assume that a fully formed and compact Tyr<sup>122</sup>-hydrophobic cluster is required for stabilizing the Ca<sup>2+</sup>-free sites in the *E2P* ground state. The cluster in *E2*·BeF<sub>3</sub><sup>-</sup> crystallized in Mg<sup>2+</sup> is possibly disrupted by the Mg<sup>2+</sup> binding at or near the transport site, as also could occur by luminal Ca<sup>2+</sup> binding to *E2*·BeF<sub>3</sub><sup>-</sup> (*E2P*) to produce *E2Ca*<sub>2</sub>·BeF<sub>3</sub><sup>-</sup> (*E2PCa*<sub>2</sub>). It is possible that the structure of Mg<sup>2+</sup>-bound *E2*·BeF<sub>3</sub><sup>-</sup> is somewhat between that of the *E2PCa*<sub>2</sub> transient state and that of the *E2P* ground state, as possibly in *E2P* with bound (but not occluded) Ca<sup>2+</sup> within the open release pathway. If this is the case, the crystal structure of Mg<sup>2+</sup>-bound *E2*·BeF<sub>3</sub><sup>-</sup> may suggest that the Tyr<sup>122</sup>-hydrophobic cluster is only fully formed on Ca<sup>2+</sup> release and appearance of the *E2P* ground state with empty transport sites.

It is also possible that *E2*·BeF<sub>3</sub><sup>-</sup> crystallized at low pH (with likely protonation of transport sites and open luminal gate *i.e.* un-occluded protons) may rather reflect an *E2P* ground state after protonation of the transport sites but before gate-closure. Closure of the gate is achieved subsequently in the transition state with occlusion of the protons (25). This view agrees with the predicted proton-counter transport mechanism, in which protonation occurs in the *E2P* ground state (*e.g.* see Scheme 2 in Ref. 56). In this case, the structure *E2*·BeF<sub>3</sub><sup>-</sup> crystallized at the low pH may suggest that the compact Tyr<sup>122</sup>-hydrophobic cluster becomes loose by the protonation in the *E2P* ground state. Actually, the cluster (either full and compact or loose) formed in the *E2P* ground state is disassembled or becomes very loose upon *E2P* hydrolysis to *E2* (as demonstrated by the very rapid prtK-cleavage at Leu<sup>119</sup> in *E2* (Ref. 23, and see Supplemental Figs. S3 and S4)).

In the two types of crystals *E2*·BeF<sub>3</sub><sup>-</sup> formed with Mg<sup>2+</sup> or with low pH, it is interesting to note that the luminal gate is much more widely opened with Mg<sup>2+</sup> than with the likely protonation at the low pH. Taking into account these possible interpretations of the two types of *E2*·BeF<sub>3</sub><sup>-</sup> crystals, it is tempting to speculate that the successive structural changes for gate opening to release Ca<sup>2+</sup> (*E2PCa*<sub>2</sub> → *E2P* + 2Ca<sup>2+</sup>), protonation of the empty sites in the *E2P* ground state, and the subsequent gate closure to occlude protons and to prevent Ca<sup>2+</sup> leakage may possibly be described by the following changes. Namely, *E2Ca*<sub>2</sub>·BeF<sub>3</sub><sup>-</sup> with a closed gate (*E2PCa*<sub>2</sub> with the occluded two Ca<sup>2+</sup>) → *E2*·BeF<sub>3</sub><sup>-</sup> with an open gate crystallized with Mg<sup>2+</sup> (possibly similar to *E2P* with un-occluded Ca<sup>2+</sup> immediately before Ca<sup>2+</sup> release) → *E2*·BeF<sub>3</sub><sup>-</sup> with an open gate without any ligation (the genuine *E2P* ground state after Ca<sup>2+</sup> release, *i.e.* with empty transport sites) → *E2*·BeF<sub>3</sub><sup>-</sup> with an open gate crystallized at the low pH (*E2P* with the protonated transport sites before closing gate) → *E2*·AlF<sub>4</sub><sup>-</sup> with closed gate (the transition state of *E2P* hydrolysis, with occluded protons).

#### **Roles of A/M1'-linker and Interaction Network at Tyr<sup>122</sup> in Ca<sup>2+</sup>-release from *E2PCa*<sub>2</sub>**

What our present and previous studies clearly reveal is that the A/M1'-linker and its strain in *E2PCa*<sub>2</sub>, is critical for Ca<sup>2+</sup>-deocclusion/release from the transient *E2PCa*<sub>2</sub> state thereby producing the Ca<sup>2+</sup>-free *E2P* ground state. This is accomplished probably by inducing the inclining motions of the A and P domains and connected helices M2/M1 and M4/M5 (Fig. 2 and supplemental Figs. S5 and S6). Such movements are reflected in the changes in resistance of Leu<sup>119</sup> at the top part of M2 against prtK and of the tryptic T2 site Arg<sup>198</sup> on the Val<sup>200</sup> loop, showing that the structure of *E2Ca*<sub>2</sub>·BeF<sub>3</sub><sup>-</sup> (*E2PCa*<sub>2</sub>) is intermediate between those of *E1Ca*<sub>2</sub>·BeF<sub>3</sub><sup>-</sup> (*E1PCa*<sub>2</sub>) and the Ca<sup>2+</sup>-free *E2*·BeF<sub>3</sub><sup>-</sup> (*E2P*). The Ca<sup>2+</sup>-free *E2P* ground state with the luminal gate open is stabilized by the interaction network around Tyr<sup>122</sup> (either by the fully produced compact Tyr<sup>122</sup>-hydrophobic cluster or by the loose cluster with extended interaction network around Leu<sup>119</sup>/Tyr<sup>122</sup>).

Fig. S5

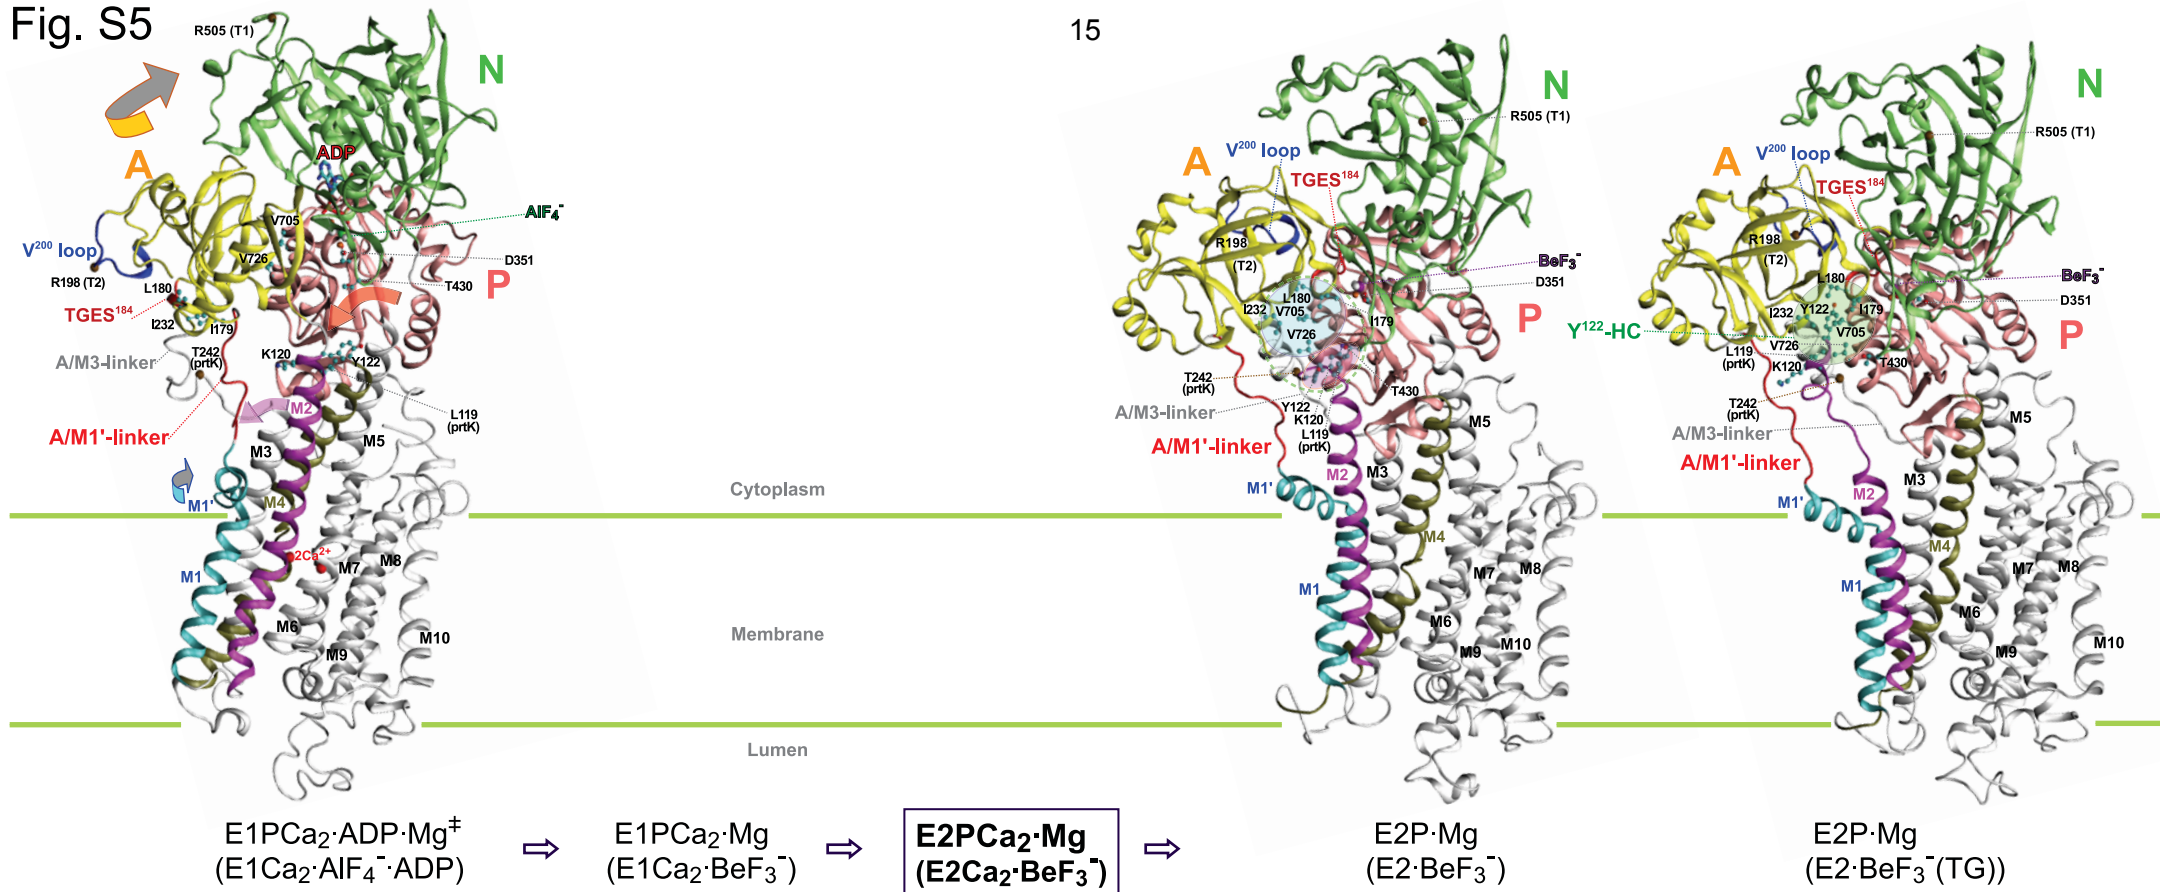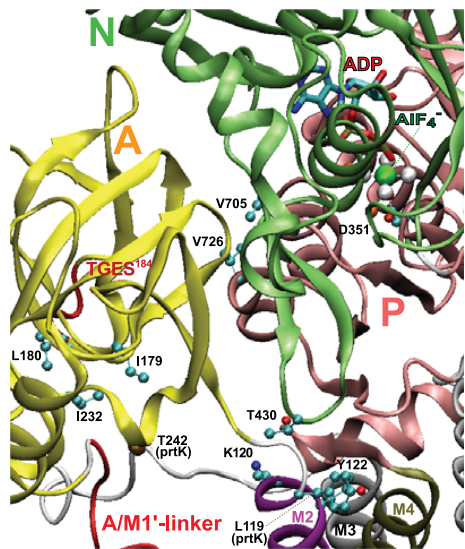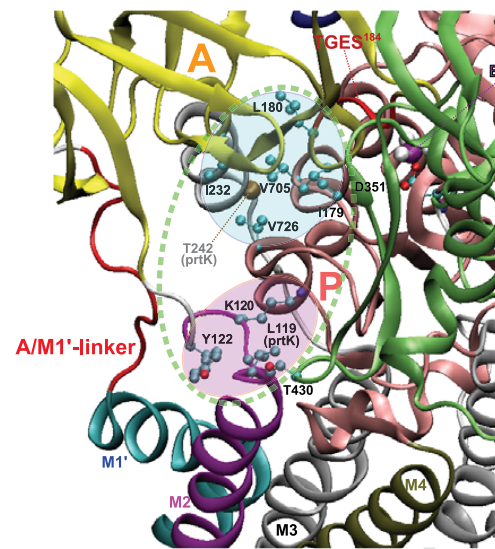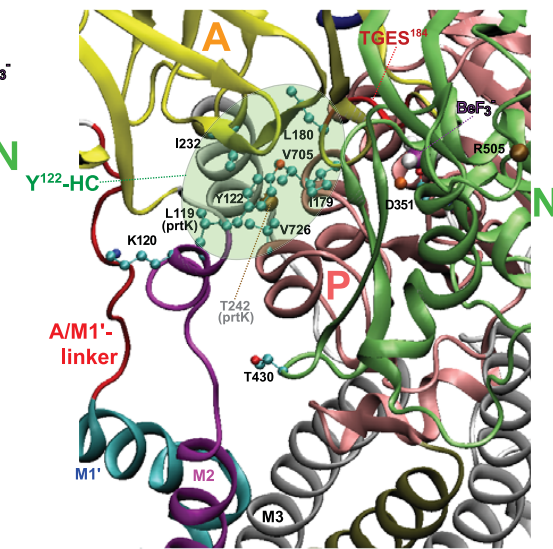

Supplemental Figure S6.

**A cartoon illustrating the structural changes of the  $\text{Ca}^{2+}$ -ATPase and the predicted functional role of the A/M1'-linker during EP processing and  $\text{Ca}^{2+}$  release.**

The schematic model was constructed on the basis of the mutation and kinetic studies of the A/M1'-linker (this study and Refs. 14 and 26) and Tyr<sup>122</sup>-hydrophobic cluster (11-13), the proteolytic analyses (this study and Refs. 14, 23-25, and 27), and the crystal structures noted in the parentheses in the Figure. The *large curved arrows* indicate the approximate motions of the A domain (A), the A domain together with the P domain (A-P), M2, and M1' to realize the next structural state. The tryptic T2 site Arg<sup>198</sup> (198) and prtK-sites Leu<sup>119</sup> (119) and Thr<sup>242</sup> (242) are indicated in each of the intermediates with (  ) for rapid cleavage, (  ) for slow cleavage, and (  ) for complete resistance. Note that the A/M1'-linker is strained in  $E2\text{PCa}_2$  and the strain induces the inclinations of the A and P domains (A-P), M4/M5, and M2 to release  $\text{Ca}^{2+}$  and to realize the  $\text{Ca}^{2+}$ -released  $E2\text{P}$ . The structural models of  $E2$ ,  $E1\text{Ca}_2$ , and  $E1\text{PCa}_2\cdot\text{ADP}\cdot\text{Mg}^{\ddagger}$  (the transition state of phosphorylation) are smaller in size to show the whole transport cycle.



Fig. S6

Proteolysis sites  
198 tryptic T2 site (Arg<sup>198</sup>)  
119 prtK site (Leu<sup>119</sup>)  
242 prtK site (Thr<sup>242</sup>)

Cleavage rate by proteolysis  
→ rapid cleavage  
→ slow cleavage  
→ complete resistance

$E2 \cdot P_i \cdot Mg$   
 $(E2 \cdot MgF_4^{2-}(TG))$

$E2P \cdot Mg^{\ddagger}$   
 $(E2 \cdot AlF_4^-(TG))$

$\gamma^{122}$ -hydrophobic cluster

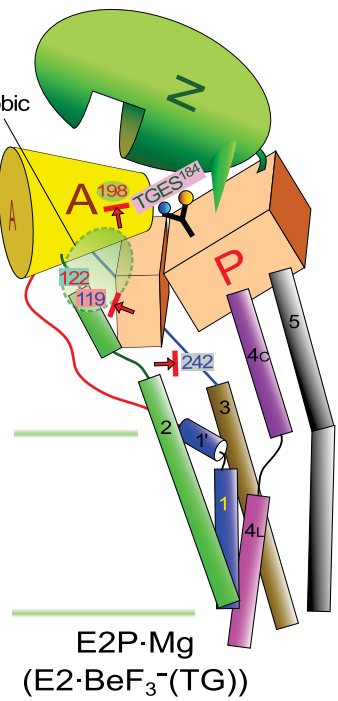

Hydrophobic interaction networks

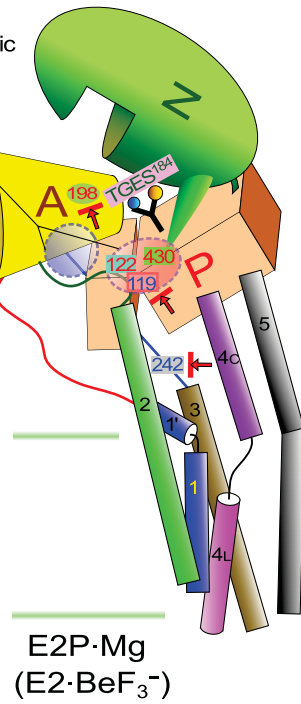

17

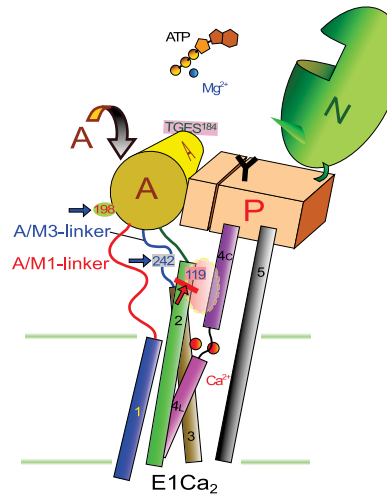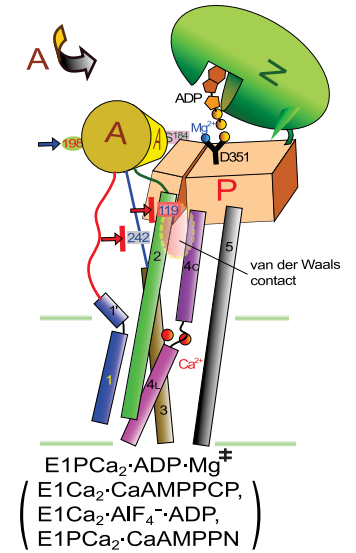

$A \cdot P$

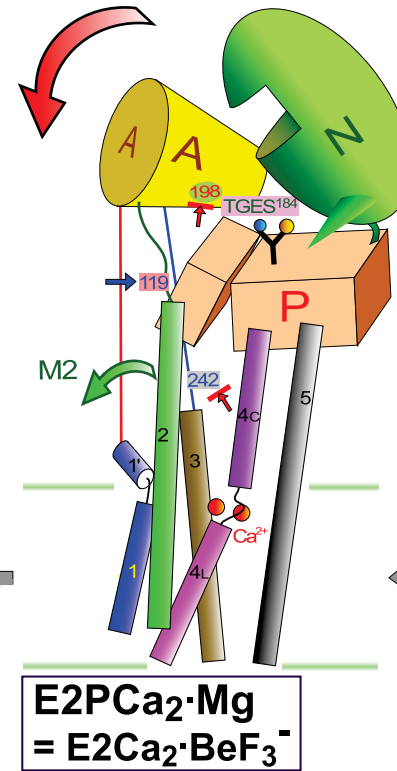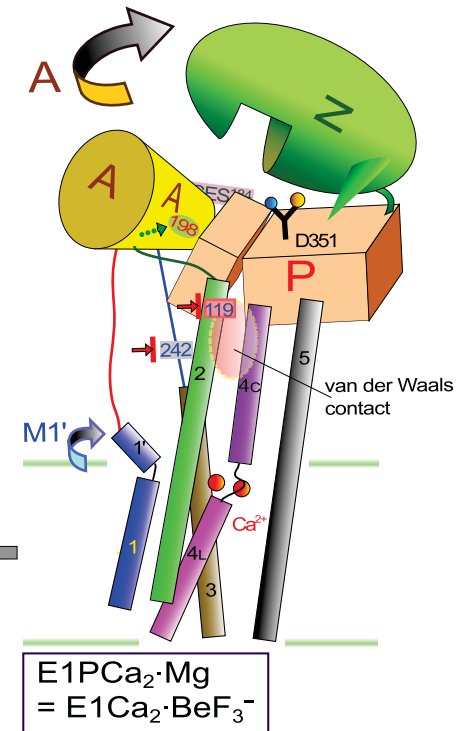

Supplement: supp_M110.144535_jbc.M110.144535-1.pdf [file supp_M110.144535_jbc.M110.144535-1.pdf]
